# Supplementary material
Source: PubMed Central journal article supplement (PMC10097819)
Supplement: 41467_2023_37573_MOESM1_ESM.pdf [file 41467_2023_37573_MOESM1_ESM.pdf]

**Supplementary Figure S1 – BRI and GELDA display na aditive effect Against *A. fumigatus***

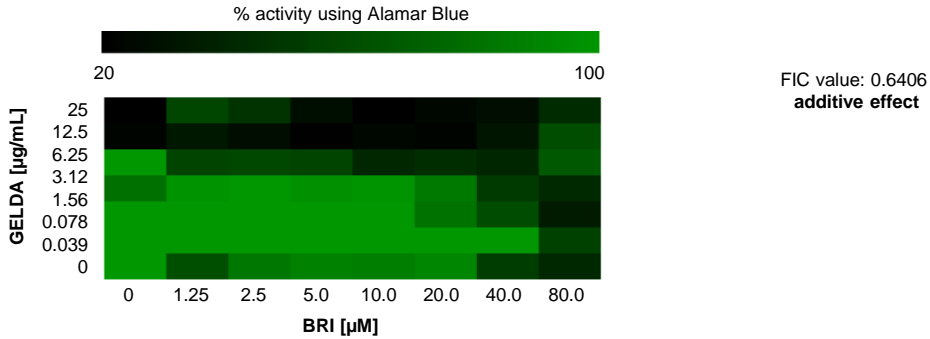

Supplementary Figure S1- The Fractional Inhibitory Concentration (FIC) index for BRI+GELDA. The heat map was generated by measurement of the metabolic activity using Alamar blue. The % of activity is based on *A. fumigatus* grown for 48 h at 37°C in the absence of BRI (ranging from 0-80 $\mu\text{M}$ ) and GELDA (ranging from 0-25 $\mu\text{g/mL}$ ). Results show the average of three independent experiments.

**Supplementary Figure S2 - Caspofungin displays a fungistatic activity against the wild-type,  $\Delta mpkA$ , and  $\Delta calA$  strains**

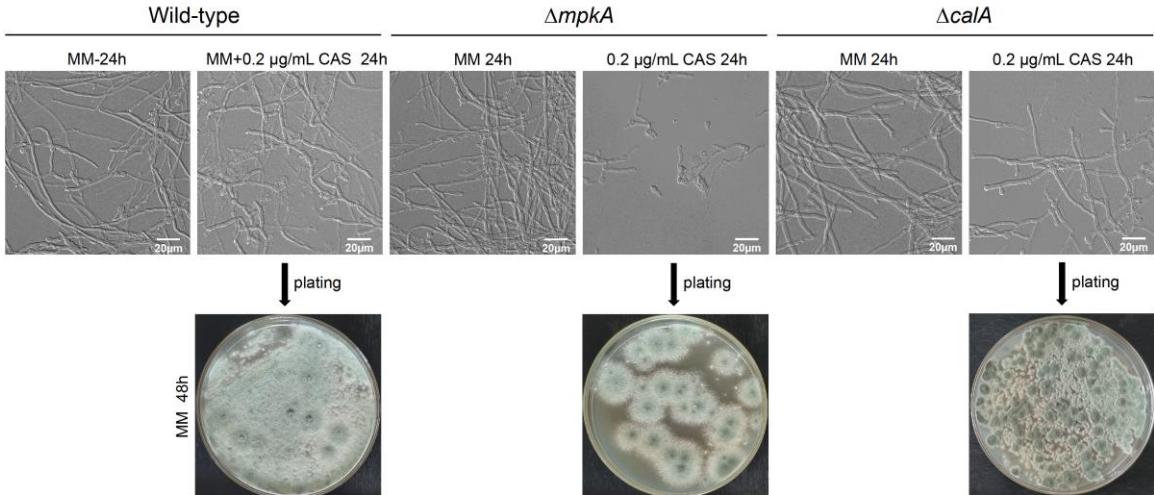

Supplementary Figure S2 – Caspofungin displays a fungistatic activity against the wild-type,  $\Delta mpkA$ , and  $\Delta calA$  strains. The wild-type,  $\Delta mpkA$ , and  $\Delta calA$  ( $2 \times 10^3$  conidia) were grown for 24 h in 200  $\mu\text{l}$  liquid minimal medium (MM) supplemented or not with caspofungin 0.2  $\mu\text{g/mL}$  for 24 h at 37°C. The 200  $\mu\text{l}$  were plated on solid MM and incubated for 48 h at 37°C. The experiment was repeated independently 3 times and presented similar results.

Supplementary Figure S3 – The *A. fumigatus* chitin synthases mRNA levels after exposure to caspofungin and brilicadin.

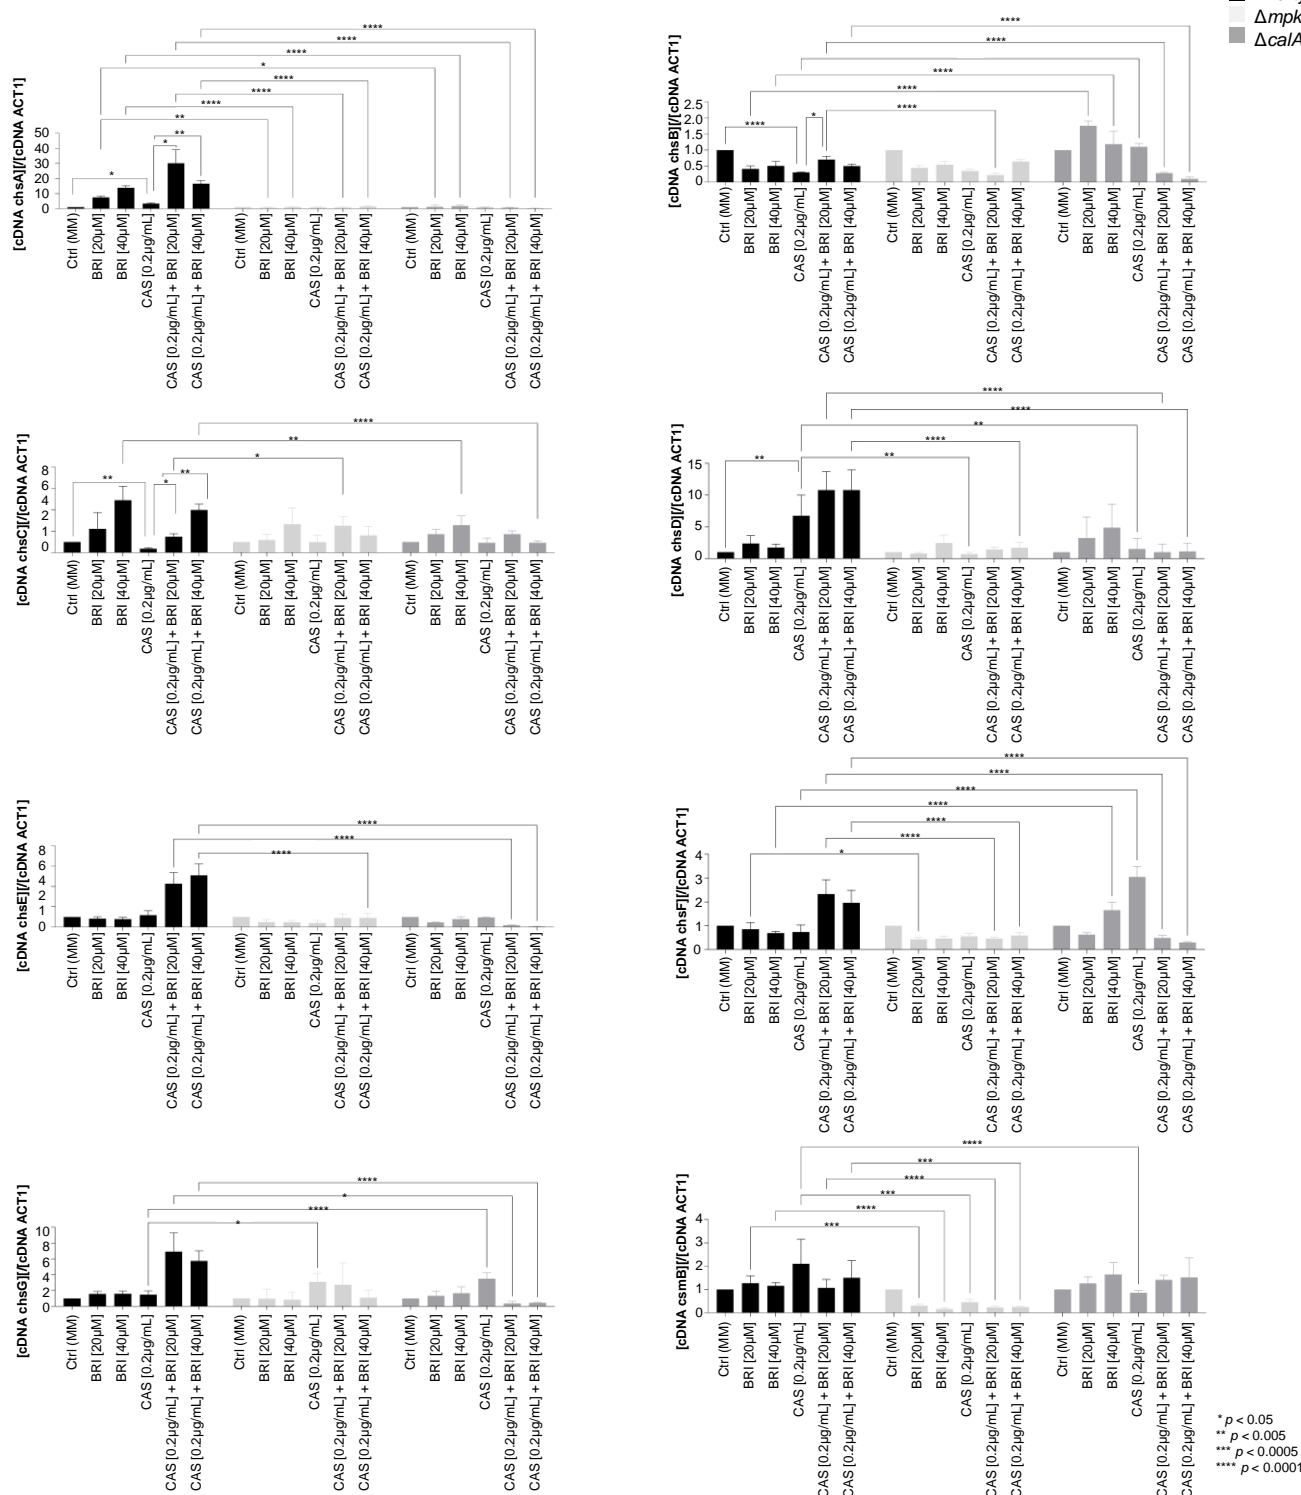

Supplementary Figure S3 – The *A. fumigatus* chitin synthases mRNA levels after exposure to caspofungin and brilicadin. The chitin synthase gene mRNA accumulation under exposure to caspofungin and brilicadin was measured in the wild-type,  $\Delta mpkA$  and  $\Delta calA$  strains. After 24h of growth at 37°C in MM, the mycelia were transferred to minimal medium (MM) containing (or not) CAS, BRI or combination of both drugs for 60 min. The results are expressed as the average fold increase  $\pm$ SD of the control cDNA (MM without drug) for a specific gene from three independent biological experiments with 3 technical repetitions each (n=3; 2way ANOVA, Tukey's post-test; \*  $p < 0.05$ , \*\*  $p < 0.005$ , \*\*\*  $p < 0.0005$ , and \*\*\*\*  $p < 0.0001$ ).

Supplementary Table S1 - BRI+VOR cannot overcome *A. fumigatus* VOR-resistance

| Strain     | Mechanism of VOR <sup>R</sup> | MIC VOR [µg/ml] | MIC BRI [µM] | VOR [µg/ml] |     | BRI [µM] | 0.5 µg/ml VOR |           | 2 µg/ml VOR |           |
|------------|-------------------------------|-----------------|--------------|-------------|-----|----------|---------------|-----------|-------------|-----------|
|            |                               |                 |              | 0.5         | 2   | 20       | 20 µM BRI     | 40 µM BRI | 20 µM BRI   | 40 µM BRI |
|            |                               |                 |              |             |     |          |               |           |             |           |
| WT         | WT                            | 2               | >80          | ---         | --- | +        | ---           | ---       | ---         | ---       |
| CYP-15-184 | TR34/L98H                     | 8               | >80          | +           | +   | +        | +             | +         | +           | +         |
| CYP-15-190 | TR34/L98H                     | 8               | >80          | +           | +   | +        | +             | +         | +           | +         |
| CYP-15-192 | TR34/L98H                     | 4               | >80          | +           | +   | +        | +             | +         | +           | +         |
| CYP-15-195 | TR34/L98H                     | 8               | >80          | +           | +   | +        | +             | +         | +           | +         |
| CYP-15-202 | TR34/L98H                     | 8               | >80          | +           | +   | +        | +             | +         | +           | +         |
| CYP-15-212 | TR34/L98H                     | 8               | >80          | +           | +   | +        | +             | +         | +           | +         |
| CYP-15-213 | TR34/L98H                     | 4               | >80          | +           | +   | -        | +             | +         | +           | +         |
| CYP-15-215 | Unknown                       | 8               | >80          | +           | +   | -        | +             | +         | +           | +         |
| CYP-15-220 | TR34/L98H                     | 4               | >80          | +           | +   | +        | +             | +         | +           | +         |
| CYP-15-221 | TR34/L98H                     | 8               | >80          | +           | +   | +        | +             | +         | +           | +         |
| CYP-15-222 | TR34/L98H                     | 4               | >80          | +           | +   | +        | +             | +         | +           | +         |
| CYP-15-224 | Unknown                       | 8               | >80          | +           | +   | +        | +             | +         | +           | +         |
| CYP-15-225 | Unknown                       | 8               | >80          | +           | +   | +        | +             | +         | +           | +         |
| CYP-15-226 | TR34/L98H                     | 4               | >80          | +           | +   | +        | +             | +         | +           | +         |
| CYP-15-228 | TR34/L98H                     | 4               | >80          | +           | +   | +        | +             | +         | +           | +         |
| CYP-15-229 | TR34/L98H                     | 8               | >80          | +           | +   | +        | +             | +         | +           | +         |
| CYP-15-230 | TR34/L98H                     | 8               | >80          | +           | +   | +        | +             | +         | +           | +         |
| CYP-15-231 | TR34/L98H                     | 4               | >80          | +           | +   | +        | +             | +         | +           | +         |
| CYP-15-75  | Unknown                       | 8               | >80          | +           | +   | +        | +             | +         | +           | +         |
| CYP-15-108 | Unknown                       | 8               | >80          | +           | +   | +        | +             | +         | +           | +         |
| CYP-15-109 | Unknown                       | >8              | >80          | ---         | --- | +        | ---           | ---       | ---         | ---       |
| CYP-15-147 | Unknown                       | 8               | >80          | +           | +   | +        | -             | -         | +           | +         |
| F14946     | Unknown                       | 8               | >80          | +           | +   | +        | +             | +         | +           | +         |
| 20089320   | Unknown                       | 8               | >80          | +           | +   | +        | +             | +         | +           | +         |

Obs.: 1) VOR=voriconazole; BRI=Brilacidin. (+): no inhibition; (-): partial inhibition; and (---) total inhibition;

2) In the experiment, one strain (CYP15-15-109) was totally inhibited by VOR, showing Wild Type response; also, one strain (CYP15-15-147) was partially inhibited by VOR 0.5 µg/ml+BRI but the inhibition was not seen at VOR 2.0 µg/ml+BRI.

Supplementary Table S2. Protein kinase inhibitors analysed in this study

| COMPOUND NAME | TARGET KINASE | PKI [20 μM] | PKI [20 μM] + BRI [20 μM] | SMILES                                                                                                | molecular weight (MW) |
|---------------|---------------|-------------|---------------------------|-------------------------------------------------------------------------------------------------------|-----------------------|
| PF +3758309   | PAK3          | ++          | ++                        | <chem>CC1=NC2=C(SC=C2)C(NC3=NNC4=C3CN(C(N[C@@H](C5=CC=CC=C5)CN(C)C)=O)C4(C)C)=N1</chem>               | 490.634               |
| FRAX597       |               | ++          | ++                        | <chem>CCN1C2=NC(=NC=C2C=C(C1=O)C3=C(C=C(C=C3)C4=CN=CS4)Cl)NC5=CC=C(C=C5)N6CCN(CC6)C</chem>            | 558.108               |
| FRAX486       |               | ++          | +                         | <chem>C1C1=CC(C1)=C(C2=CC3=CN=C(NC4=CC(F)=C(N5CCNCC5)C=C4)N=C3N(CC)C2=O)C=C1</chem>                   | 513.403               |
| G5555         |               | ++          | ++                        | <chem>CNC1=NC=C2C=C(C3=C(C=C(C4=CC=CC(C)=N4)C=C3)Cl)C(N(C2=N1)C[C@@H]5OC[C@@H](CO5)N)=O</chem>        | 492.966               |
| GW300660X     | PRKAA1        | ++          | ++                        | <chem>NS(=O)(=O)c1ccc(NN=C2/C(=O)Nc3ccc(cc23)C(=O)NCCc2c[nH]cn2)cc1</chem>                            | 453.482               |
| GW296115X     |               | ++          | ++                        | <chem>COc1ccc2[nH]c3c4[nH]c5ccc(OC)cc5c4c4C(=O)NC(=O)c4c3c2c1</chem>                                  | 385.378               |
| GW416981X     |               | ++          | ++                        | <chem>CC(C)COC(=O)c1ccc2NC(=O)\C(=C/Nc3ccc(cc3)S(N)(=O)=O)c2c1</chem>                                 | 415.469               |
| GW290597X     |               | ++          | ++                        | <chem>NS(=O)(=O)c1ccc(NN=C2/C(=O)Nc3ccc(cc23)C(=O)NCCc2c[nH]cn2)cc1</chem>                            | 467.509               |
| CHIR +99021   | GSK3A         | ++          | ++                        | <chem>N#CC(C=N1)=CC=C1NCCNC2=NC=C(C3=NC(C)=CN3)C(C4=CC=C(Cl)C=C4Cl)=N2</chem>                         | 465.347               |
| SB 216763     |               | ++          | ++                        | <chem>Clc1ccc(c(Cl)c1)C1=C(C(=O)NC1=O)c1cn(C)c2cccc12</chem>                                          | 371.222               |
| LY2090314     |               | ++          | ++                        | <chem>O=C(N1)C(C2=CN=C3N2C=CC=C3)=C(C4=CN5C6=C4C=C(F)C=C6CN(C7CCCCC7=O)CC5)C1=O</chem>                | 512.543               |
| AZD1080       |               | ++          | ++                        | <chem>OC(NC1=C2C=C(C#N)C=C1)=C2C3=NC=C(CN4CCOCC4)C=C3</chem>                                          | 334.378               |
| AZD +8055     | MTOR          | ++          | ++                        | <chem>C[C@H]1COCCN1C2=NC(=NC3=C2C=CC(=N3)C4=CC(=C(C=C4)OC)C(O)N5CCOC[C@@H]5C</chem>                   | 465.552               |
| vistusertib   |               | ++          | ++                        | <chem>C[C@H]1COCCN1C2=NC(=NC3=C2C=CC(=N3)C4=CC(=CC=C4)C(=O)N)N5CCOC[C@@H]5C</chem>                    | 462.552               |
| Torin 2       |               | ++          | ++                        | <chem>C1=CC(=CC(=C1)N2C(=O)C=CC3=CN=C4C=CC(=CC4=C32)C5=CN=C(C=C5)N)C(F)(F)F</chem>                    | 432.404               |
| CC +115       |               | ++          | ++                        | <chem>CCN1C(=O)CNC2=NC=C(N=C21)C3=C(N=C(C=C3)C4=NC=NN4)C</chem>                                       | 336.358               |
| D4476         | CSNK1G2       | ++          | ++                        | <chem>C1COC2=C(O1)C=CC(=C2)C3=C(NC(=N3)C4=CC=C(C=C4)C(=O)N)C5=CC=CC=N5</chem>                         | 398.421               |
| NK +258       |               | ++          | ++                        | <chem>CN(C)C(C=C1)=NN2C1=NC=C2C3=CC=CC(OC(F)(F)F)=C3</chem>                                           | 322.289               |
| PP121         | STK25         | ++          | +                         | <chem>C1CCC(C1)N2C3=C(C(=N2)C4=CN=C5C(=C4)C=C5)C(=NC=N3)N</chem>                                      | 319.371               |
| BX +795       |               | ++          | ++                        | <chem>O=C(NCCCNC1=C(C=NC(NC2=CC=CC(NC3CCCC3)=O)=C2=N1))C4=CC=CS4</chem>                               | 591.472               |
| SCH772984     | MAPK3 (ERK1)  | ++          | ++                        | <chem>C1CN(CC1C(=O)NC2=CC3=C(C=C2)NN=C3C4=CC=NC=C4)CC(=O)N5CCN(CC5)C6=CC=C(C=C6)C7=NC=CC=N7</chem>    | 587.686               |
| GW305074X     |               | ++          | ++                        | <chem>Oc1c(Br)cc(C=C2C(=O)Nc3ccc(l)cc23)cc1Br</chem>                                                  | 520.942               |
| XMD8 +92      |               | ++          | ++                        | <chem>CCOC1=C(C=CC(=C1)N2CCC(CC2)O)NC3=NC=C4C(=N3)N(C5=CC=C(C=C5)C(=O)N4)C</chem>                     | 474.563               |
| GW300657X     |               | ++          | ++                        | <chem>NS(=O)(=O)c1ccc(NN=C2/C(=O)Nc3ccc(cc23)C(=O)NCCc2c[nH]cn2)cc1</chem>                            | 450.478               |
| PF +4708671   | RPS6KB2       | ++          | ++                        | <chem>CCC1=CN=CN=C1N2CCN(CC2)CC3=NC4=C(N3)C=C(C=C4)C(F)(F)F</chem>                                    | 390.412               |
| LY +2584702   |               | ++          | ++                        | <chem>CC1=CC=C(C=C1)S(=O)(=O)O.CN1C=C(N=C1C2CCN(CC2)C3=NC=NC4=C3C=NN4)C5=CC(=C(C=C5)F)C(F)(F)F</chem> | 617.626               |
| AT7867        |               | ++          | ++                        | <chem>C1CNCCC1(C2=CC=C(C=C2)C3=CN=C3)C4=CC=C(C=C4)Cl.Cl.Cl</chem>                                     | 410.775               |
| VX +745       | MAPK11        | ++          | ++                        | <chem>C1=CC(=C(C=C1)Cl)C2=C3C=CC(=NN3C=NC2=O)SC4=C(C=C(C=C4)F)F)Cl</chem>                             | 436.268               |
| AKI00000001a  |               | ++          | ++                        | <chem>FC(C=C1)=CC(F)=C1C2=C(C(C=C3)=NN4C3=NN=C4C(O)(C)N(CCC5)C5=N2</chem>                             | 396.4                 |
| AKI00000067a  |               | ++          | ++                        | <chem>FC(C=C1)=CC(F)=C1C2=C(C(C=C3)=CN4C3=NN=C4C(C)N(C=CO5)C5=N2</chem>                               | 379.369               |
| GSK223810A    |               | ++          | ++                        | <chem>COc1cc2c(Nc3cccc(NC(=O)c4cccc4)c3)nnc2cc1OCCCN1CCOCC1</chem>                                    | 513.596               |

|                    |         |    |    |                                                                                                         |         |
|--------------------|---------|----|----|---------------------------------------------------------------------------------------------------------|---------|
| ralimetinib        |         |    |    | CC(C)(C)CN1C2=C(C=CC(=N2)C3=C(N=C(N3)C(C)(C)C)C4=CC=C(C=C4)F)N=C1N.CS(=O)(=O)O.CS(=O)(=O)O              | 612.746 |
| TAK +715           | CSNK1E  | ++ | ++ | CCC1=NC(=C(S1)C2=CC(=NC=C2)NC(=O)C3=CC=CC=C3)C4=CC=CC(=C4)C                                             | 399.517 |
| PF +670462         |         | ++ | ++ | C1CCC(CC1)N2C=NC(=C2C3=NC(=NC=C3)N)C4=CC=C(C=C4)F.Cl.Cl                                                 | 410.323 |
| CK1 +IN +1         |         | ++ | ++ | C1=CC=C2C(=C1)C=CC(=C2F)C3=NC(=C(N3)C4=CC=NC=C4)C5=CC=C(C=C5)F                                          | 383.4   |
| PF +5006739        |         | ++ | ++ | C1CN(CCC1N2C=NC(=C2C3=NC(=NC=C3)N)C4=CC=C(C=C4)F)CC5=NC(=O)C5                                           | 419.463 |
| MK +8353           | MAPK1   | ++ | ++ | CC(C)OC1=NC=C(C=C1)C2=NNC3=C2C=C(C=C3)NC(=O)[C@@]4(CCN(C4)CC(=O)N5CCC(=CC5)C6=CC=C(C=C6)C7=NN(C=N7)C)SC | 691.859 |
| PHA +767491        | CDC7    | ++ | ++ | C1CNC(=O)C2=C1NC(=C2)C3=CC=NC=C3                                                                        | 213.239 |
| XL413              |         | ++ | ++ | C1C[C@H](NC1)C2=NC3=C(C(=O)N2)OC4=C3C=C(C=C4)Cl                                                         | 289.721 |
| LY3177833          |         | ++ | ++ | C[C@@]1(C2=C(C=C(C=C2)C3=CN=C3)C(=O)N1)C4=NC=NC=C4F                                                     | 309.303 |
| refametinib        | MAP2K2  | ++ | ++ | COC1=CC(=C(C=C1)NS(=O)(=O)C2(CC2)C[C@@H](CO)O)NC3=C(C=C(C3)F)F)F                                        | 572.337 |
| selumetinib        |         | ++ | ++ | CN1C=NC2=C1C=C(C(=C2F)NC3=C(C=C(C=C3)Br)Cl)C(=O)NOCCO                                                   | 457.686 |
| SR +3677           | CAMK1G  | ++ | ++ | O=C(C3COC(C=CC=C4)=C4O3)NC1=CC=C(C2=CN=C2)C=C1OCCN(C)C.Cl.Cl                                            | 481.378 |
| CX +4945           | CSNK2A2 | ++ | ++ | C1=CC(=CC(=C1)Cl)NC2=NC3=C(C=CC(=C3)C(=O)O)C4=C2C=CN=C4                                                 | 349.776 |
| SGC +CK2 +1        | CSNK2A2 | ++ | ++ | CC1=CC=C(NC2=NC3=C(C#N)C=NN3C(NC4CC4)=C2)C=C1NC(CC)=O                                                   | 375.435 |
| TTP 22             |         | ++ | ++ | CC(C=C1)=CC=C1C2=CSC3=NC=NC(SCCC(O)=O)=C32                                                              | 330.4   |
| Sorafenib          | MAPK13  | ++ | ++ | CNC(=O)C1=NC=CC(=C1)OC2=CC=C(C=C2)NC(=O)NC3=CC(=C(C=C3)Cl)C(F)(F)F                                      | 464.83  |
| 5 -iodo tubercidin | MAP2K3  | +  | ++ | O[C@H]1[C@H](N2C=C(I)C3=C(N)N=CN=C32)O[C@H](CO)[C@H]1O                                                  | 392.148 |
| SB +216385         |         | ++ | ++ | Nc1nccc(n1) +c1c(ncn1CCCN1CCOCC1) +c1ccc(F)cc1                                                          | 382.442 |
| SB +203580         | PRKCA   | ++ | ++ | CS(=O)C1=CC=C(C=C1)C2=NC(=C(N2)C3=CC=NC=C3)C4=CC=C(C=C4)F                                               | 377.442 |
| enzastaurin        |         | ++ | ++ | CN1C=C(C2=CC=CC=C2)C3=C(C(=O)NC3=O)C4=CN(C5=CC=CC=C5)C6CCN(CC6)CC7=CC=CC=N7                             | 515.615 |
| darovasertib       |         | ++ | ++ | CC1(CCN(CC1)C2=C(N=CC=C2)NC(=O)C3=NC(=CN=C3N)C4=C(C=CC(=N4)C(F)(F)F)N                                   | 472.474 |
| GW461487A          |         | ++ | ++ | Cl.Cc1cccc2c(c(nn12) +c1ccc(F)cc1) +c1ccncc1                                                            | 339.8   |
| UNC +ALM +33       |         | ++ | ++ | CC1=CC2=NC(C3=CC=C(F)C=C3)=C(C4=CC=NC=C4)N2C=C1                                                         | 303.339 |
| UNC +ALM +39       |         | +  | ++ | CC(C=N1)=CN2C1=C(C3=CC=NC=C3)C(C4=CC=C(F)C=C4)=N2                                                       | 304.327 |
| UNC +ALM +16       |         | +  | ++ | CC(C=C1)=NN2C1=C(C3=CC=NC=C3)C(C4=CC=C(F)C=C4)=N2                                                       | 304.327 |
| UNC +ALM +87       |         | ++ | ++ | FC1=CC=C(C2=C(C3=CC=NC=C3)N4C(SC(C)=C4)=N2)C=C1                                                         | 309.367 |
| GW434756X          |         | ++ | ++ | Fc1ccc(cc1) +c1nn2cccc2c1 +c1ccncc1                                                                     | 289.31  |

++: growth ≥ 80% compared to no treatment

+: growth ≤ 60% compared to no treatment

Supplementary Table S3. Susceptibility of phosphatase and kinase mutants to brilacidin

| Strain                          | CAS [0.25 µg/mL] | BRI [20 µM] |
|---------------------------------|------------------|-------------|
| <b>Reference strains</b>        |                  |             |
| CEA17 (wild-type; A1160)        | +                | +           |
| Afs35 (wild-type; A1159)        | +                | +           |
| <b>phosphatase null mutants</b> |                  |             |
| <i>ΔpphA</i> (Afu5g12010)       | +                | +           |
| <i>ΔsitA</i> (Afu6g11470)       | +                | +           |
| <i>ΔppzA</i> (Afu2g03950)       | +                | +           |
| <i>ΔpptA</i> (Afu5g06700)       | +                | +           |
| <i>ΔptcA</i> (Afu1g15800)       | +                | +           |
| <i>ΔptcB</i> (Afu1g09280)       | +                | +           |
| <i>ΔppmA</i> (Afu8g04580)       | +                | +           |
| <i>ΔptcD</i> (Afu5g13740)       | +                | +           |
| <i>ΔptcE</i> (Afu2g03890)       | +                | +           |
| <i>ΔptcF</i> (Afu1g06860)       | +                | +           |
| <i>ΔptcG</i> (Afu5g13340)       | +                | +           |
| <i>ΔptcH</i> (Afu4g00720)       | +                | +           |
| <i>ΔnemA</i> (Afu1g09460)       | +                | +           |
| <i>ΔpsrA</i> (Afu1g04790)       | +                | +           |
| <i>ΔppsA</i> (Afu5g11690)       | +                | +           |
| <i>ΔdspD</i> (Afu2g02760)       | +                | +           |
| <i>ΔcdcA</i> (Afu3g12250)       | +                | +           |
| <i>ΔdspA</i> (Afu1g13040)       | +                | +           |
| <i>ΔdspB</i> (Afu1g03540)       | +                | +           |
| <i>ΔptpB</i> (Afu3g10970)       | +                | +           |
| <i>ΔpypA</i> (Afu4g04710)       | +                | +           |
| <i>ΔltpA</i> (Afu2g01880)       | +                | +           |
| <i>ΔyphA</i> (Afu4g07000)       | +                | +           |
| <i>ΔptyA</i> (Afu6g06650)       | +                | +           |
| <i>ΔcalA</i> (Afu5g09360)       | +                | -           |
| <b>kinases null mutants</b>     |                  |             |
| <i>ΔmpkA</i>                    | -                | -           |
| <i>ΔmpkB</i>                    | +                | +           |
| <i>ΔmpkC</i>                    | +                | +           |
| <i>ΔsakA</i>                    | +                | +           |
| <i>ΔsakA; ΔmpkC</i>             | +                | +           |

+: sensitivity similar to wild-type

-: more sensitive than the wild-type

Supplementary Table S4. Strains used in this work

| <i>Aspergillus fumigatus</i> strains | Genotype                                           | Reference          |
|--------------------------------------|----------------------------------------------------|--------------------|
| CEA17 (A1160)                        | akuB (KU80) $\Delta$ :pyrG1 MAT1-1                 | 1                  |
| Af293                                | wild-type                                          | 2                  |
| $\Delta$ pphA                        | $\Delta$ pphA::pyrG, akuB (KU80) $\Delta$ , MAT1-1 | 3                  |
| $\Delta$ sitA                        | $\Delta$ sitA::pyrG, akuB (KU80) $\Delta$ , MAT1-1 | 3                  |
| $\Delta$ ppzA                        | $\Delta$ ppzA::pyrG, akuB (KU80) $\Delta$ , MAT1-1 | 3                  |
| $\Delta$ pptA                        | $\Delta$ pptA::pyrG, akuB (KU80) $\Delta$ , MAT1-1 | 3                  |
| $\Delta$ ptcA                        | $\Delta$ ptcA::pyrG, akuB (KU80) $\Delta$ , MAT1-1 | 3                  |
| $\Delta$ ptcB                        | $\Delta$ ptcB::pyrG, akuB (KU80) $\Delta$ , MAT1-1 | 3                  |
| $\Delta$ ppmA                        | $\Delta$ ppmA::pyrG, akuB (KU80) $\Delta$ , MAT1-1 | 3                  |
| $\Delta$ ptcD                        | $\Delta$ ptcD::pyrG, akuB (KU80) $\Delta$ , MAT1-1 | 3                  |
| $\Delta$ ptcE                        | $\Delta$ ptcE::pyrG, akuB (KU80) $\Delta$ , MAT1-1 | 3                  |
| $\Delta$ ptcF                        | $\Delta$ ptcF::pyrG, akuB (KU80) $\Delta$ , MAT1-1 | 3                  |
| $\Delta$ ptcG                        | $\Delta$ ptcG::pyrG, akuB (KU80) $\Delta$ , MAT1-1 | 3                  |
| $\Delta$ ptcH                        | $\Delta$ ptcH::pyrG, akuB (KU80) $\Delta$ , MAT1-1 | 3                  |
| $\Delta$ nemA                        | $\Delta$ nemA::pyrG, akuB (KU80) $\Delta$ , MAT1-1 | 3                  |
| $\Delta$ psrA                        | $\Delta$ psrA::pyrG, akuB (KU80) $\Delta$ , MAT1-1 | 3                  |
| $\Delta$ ppsA                        | $\Delta$ ppsA::pyrG, akuB (KU80) $\Delta$ , MAT1-1 | 3                  |
| $\Delta$ dspD                        | $\Delta$ dspD::pyrG, akuB (KU80) $\Delta$ , MAT1-1 | 3                  |
| $\Delta$ cdcA                        | $\Delta$ cdcA::pyrG, akuB (KU80) $\Delta$ , MAT1-1 | 3                  |
| $\Delta$ dspA                        | $\Delta$ dspA::pyrG, akuB (KU80) $\Delta$ , MAT1-1 | 3                  |
| $\Delta$ dspB                        | $\Delta$ dspB::pyrG, akuB (KU80) $\Delta$ , MAT1-1 | 3                  |
| $\Delta$ ptpB                        | $\Delta$ ptpB::pyrG, akuB (KU80) $\Delta$ , MAT1-1 | 3                  |
| $\Delta$ pypA                        | $\Delta$ pypA::pyrG, akuB (KU80) $\Delta$ , MAT1-1 | 3                  |
| $\Delta$ ltpA                        | $\Delta$ ltpA::pyrG, akuB (KU80) $\Delta$ , MAT1-1 | 3                  |
| $\Delta$ yphA                        | $\Delta$ yphA::pyrG, akuB (KU80) $\Delta$ , MAT1-1 | 3                  |
| $\Delta$ ptyA                        | $\Delta$ ptyA::pyrG, akuB (KU80) $\Delta$ , MAT1-1 | 3                  |
| $\Delta$ calA                        | $\Delta$ calA::pyrG, akuB (KU80) $\Delta$ , MAT1-1 | 3                  |
| $\Delta$ mpkC                        | $\Delta$ mpkC::prtA                                | 4                  |
| $\Delta$ sakA                        | $\Delta$ sakA::hph                                 | 4                  |
| $\Delta$ mpkA                        | $\Delta$ mpkA::hph                                 | 5                  |
| $\Delta$ mpkB                        | $\Delta$ akuBmpkB::prtA; prtA+                     | 6                  |
| $\Delta$ sakA; $\Delta$ mpkC         | $\Delta$ mpkC::prtA $\Delta$ sakA::hph             | 7                  |
| Afs35 (A1159)                        | akuA::loxP                                         | 8                  |
| CYP-15-75                            | clinical isolate                                   | 9                  |
| CYP-15-108                           | clinical isolate                                   | 9                  |
| CYP-15-109                           | clinical isolate                                   | 9                  |
| CYP-15-147                           | clinical isolate                                   | 9                  |
| 20089320                             | clinical isolate                                   | 9                  |
| CYP-15-184                           | clinical isolate                                   | Katrien Lagrou lab |
| CYP-15-190                           | clinical isolate                                   | Katrien Lagrou lab |
| CYP-15-192                           | clinical isolate                                   | Katrien Lagrou lab |
| CYP-15-195                           | clinical isolate                                   | Katrien Lagrou lab |
| CYP-15-202                           | clinical isolate                                   | Katrien Lagrou lab |
| CYP-15-212                           | clinical isolate                                   | Katrien Lagrou lab |
| CYP-15-213                           | clinical isolate                                   | Katrien Lagrou lab |
| CYP-15-215                           | clinical isolate                                   | Katrien Lagrou lab |
| CYP-15-220                           | clinical isolate                                   | Katrien Lagrou lab |
| CYP-15-221                           | clinical isolate                                   | Katrien Lagrou lab |
| CYP-15-222                           | clinical isolate                                   | Katrien Lagrou lab |

|                                                               |                                    |                                                                                                      |
|---------------------------------------------------------------|------------------------------------|------------------------------------------------------------------------------------------------------|
| CYP-15-224                                                    | clinical isolate                   | Katrien Lagrou lab                                                                                   |
| CYP-15-225                                                    | clinical isolate                   | Katrien Lagrou lab                                                                                   |
| CYP-15-226                                                    | clinical isolate                   | Katrien Lagrou lab                                                                                   |
| CYP-15-228                                                    | clinical isolate                   | Katrien Lagrou lab                                                                                   |
| CYP-15-229                                                    | clinical isolate                   | Katrien Lagrou lab                                                                                   |
| CYP-15-230                                                    | clinical isolate                   | Katrien Lagrou lab                                                                                   |
| CYP-15-231                                                    | clinical isolate                   | Katrien Lagrou lab                                                                                   |
| F14946                                                        | clinical isolate                   | Gustavo Goldman lab                                                                                  |
| CM7555                                                        | clinical isolate                   | Gustavo Goldman lab                                                                                  |
| DPL1033                                                       | clinical isolate                   | David Perlin lab                                                                                     |
| MD24053                                                       | clinical isolate                   | David Perlin lab                                                                                     |
| <b>Candida spp. strains</b>                                   | <b>Genotype</b>                    | <b>Reference</b>                                                                                     |
| <i>C. auris</i> 467/2015                                      | clinical isolate                   | Arnaldo Colombo lab                                                                                  |
| <i>C. auris</i> 468/2015                                      | clinical isolate                   | Arnaldo Colombo lab                                                                                  |
| <i>C. auris</i> 469/2015                                      | clinical isolate                   | Arnaldo Colombo lab                                                                                  |
| <i>C. auris</i> 470/2015                                      | clinical isolate                   | Arnaldo Colombo lab                                                                                  |
| <i>C. auris</i> 474/2015                                      | clinical isolate                   | Arnaldo Colombo lab                                                                                  |
| <i>C. albicans</i> DPL1006                                    | clinical isolate; CAS <sup>R</sup> | David Perlin lab                                                                                     |
| <i>C. albicans</i> DPL1007                                    | clinical isolate; CAS <sup>R</sup> | David Perlin lab                                                                                     |
| <i>C. albicans</i> DPL1009                                    | clinical isolate; CAS <sup>R</sup> | David Perlin lab                                                                                     |
| <i>C. albicans</i> DPL1010                                    | clinical isolate; CAS <sup>R</sup> | David Perlin lab                                                                                     |
| <i>C. albicans</i> DPL1011                                    | clinical isolate; CAS <sup>R</sup> | David Perlin lab                                                                                     |
| <b>Cryptococcus neoformans</b>                                | <b>Genotype</b>                    | <b>Reference</b>                                                                                     |
| H99 (ATCC 208821)                                             | wild-type                          | ATCC database                                                                                        |
| <b>Mucorales fungi</b>                                        |                                    |                                                                                                      |
| <i>R. oryzae</i> 99-892                                       | Lung isolate                       | Fungus Testing Laboratory at the University of Texas Health Sciences Center at San Antonio (UTHSCSA) |
| <i>R. delemar</i> 99-880                                      | Brain isolate                      | Fungus Testing Laboratory at the University of Texas Health Sciences Center at San Antonio (UTHSCSA) |
| <i>L. corymbifera</i>                                         | clinical isolate from DEFEAT Mucor | Ibrahim laboratory                                                                                   |
| <i>M. circinelloides</i> f. <i>jenssenii</i> UTHSCSA DI15-131 | clinical isolate                   | Fungus Testing Laboratory at the University of Texas Health Sciences Center at San Antonio (UTHSCSA) |

## References

- Da Silva Ferreira ME, Kress MR, Savoldi M, Goldman MH, Härtl A, Heinekamp T, Brakhage AA, Goldman GH. 2006. The akuB(KU80) mutant deficient for nonhomologous end joining is a powerful tool for analysing pathogenicity in *Aspergillus fumigatus*.
- Pain A, Woodward J, Quail MA, Anderson MJ, Clark R, Collins M, Fosker N, Fraser A, Harris D, Larke N, Murphy L, Humphray S, O'Neil S, Perteu M, Price C, Rabinowitsch E, Rajandream MA, Salzberg S, Saunders D, Seeger K, Sharp S, Warren T, Denning DW, Winkelströter LK, Dolan SK, Fernanda Dos Reis T, Bom VL, Alves de Castro P, Hagiwara D, Alowni R, Jones GW, Doyle S, Brown NA, Goldman GH. Systematic Global Analysis of Genes Encoding Protein Phosphatases in *Aspergillus fumigatus*. G3 (Bethesda). 2015
- Hagiwara D., Suzuki S., Kamei K., Gono T., Kawamoto S. The role of AtfA and HOG MAPK pathway in stress tolerance in conidia of *Aspergillus fumigatus*. *Fungal Genet. Biol.* 2014;73:138–149.
- Valiante V., Jain R., Heinekamp T., Brakhage A.A. The MpkA MAP kinase module regulates cell wall integrity signaling and pyomelanin formation in *Aspergillus fumigatus*. *Fungal Genet. Biol.* 2009;46(12):909–918.
- Manfiolli AO, Siqueira FS, dos Reis TF, Van Dijk P, Schrevens S, Hoefgen S, Föge M, Straßburger M, de Assis LJ, Heinekamp T, Rocha MC, Janevska S, Brakhage AA, Malavazi I, Goldman GH, Valiante V. 2019. Mitogenactivated protein kinase cross-talk
- Bruder Nascimento A.C., Dos Reis T.F., de Castro P.A., Hori J.I., Bom V.L., de Assis L.J., Goldman G.H. Mitogen activated protein kinases SakA (HOG1) and MpkC collaborate for *Aspergillus fumigatus* virulence. *Mol. Microbiol.* 2016;100:841–859.
- FGSC, Fungal Genetic stock center
- Bastos RW, Rossato L, Valero C, Lagrou K, Colombo AL and Goldman GH (2019) Potential of Gallium as an Antifungal Agent. *Front. Cell. Infect. Microbiol.* 9:414. doi: 10.3389/fcimb.2019.00414



**Supplementary Table S5 – Primers used in this work**

| <b>Primer</b>   | <b>Sequences</b>            | <b>Gene</b> | <b>ID</b>   |
|-----------------|-----------------------------|-------------|-------------|
| <b>chsA FW</b>  | 5'-CTGGAGTGTGGCTGGTCTCT-3'  | <i>chsA</i> | AFUB_018960 |
| <b>chsA REV</b> | 5'-GCGTGTGAAAGCAGTATGGA-3'  | <i>chsA</i> | AFUB_018960 |
| <b>chsB FW</b>  | 5'-GCTCTCCACTGTCGGTCTCT-3'  | <i>chsB</i> | AFUB_098840 |
| <b>chsB REV</b> | 5'-GGTCGTTGTTGATGGTGTG-3'   | <i>chsB</i> | AFUB_098840 |
| <b>chsC FW</b>  | 5'-TTGCTGCGAGTTTGTATTCC-3'  | <i>chsC</i> | AFUB_049230 |
| <b>chsC REV</b> | 5'-GCCAGTAGGATGCCAAAGAG-3'  | <i>chsC</i> | AFUB_049230 |
| <b>chsD FW</b>  | 5'-CAGAACACGATCCGAACAAC-3'  | <i>chsD</i> | AFUB_012070 |
| <b>chsD REV</b> | 5'-GCTTCGCACCCAAGTAGAAC-3'  | <i>chsD</i> | AFUB_012070 |
| <b>chsE FW</b>  | 5'-TGGTGTTTCGTTGACTTGCTC-3' | <i>chsE</i> | AFUB_029080 |
| <b>chsE REV</b> | 5'-TCATCCATCCAACCATTTCC-3'  | <i>chsE</i> | AFUB_029080 |
| <b>chsF FW</b>  | 5'-AACCTGCTTCTTCTGGGTGA-3'  | <i>chsF</i> | AFUB_081920 |
| <b>chsF REV</b> | 5'-GAGCACGAGTTCCATGAGGT-3'  | <i>chsF</i> | AFUB_081920 |
| <b>chsG FW</b>  | 5'-AGGATGAGGGCAAAGAGGTT-3'  | <i>chsG</i> | AFUB_034810 |
| <b>chsG REV</b> | 5'-AAGGCGTTGCTAAAGATCCA-3'  | <i>chsG</i> | AFUB_034810 |
| <b>csmB FW</b>  | 5'-ACAATACGCGGCGAATCC-3'    | <i>csmB</i> | AFUB_029070 |
| <b>csmB REV</b> | 5'-GTTATCCCGACTGCCCAAAA-3'  | <i>csmB</i> | AFUB_029070 |
